# Supplementary material
Source: PubMed Central journal article supplement (PMC6501791)
Supplement: NIHMS887434-supplement-supplement_1.pdf [file NIHMS887434-supplement-supplement_1.pdf]

## Supplemental References

1. Cardone, L. et al. Circadian clock control by SUMOylation of BMAL1. *Science* **309**, 1390-4 (2005).
2. Travnickova-Bendova, Z., Cermakian, N., Reppert, S. M. & Sassone-Corsi, P. Bimodal regulation of mPeriod promoters by CREB-dependent signaling and CLOCK/BMAL1 activity. *Proc Natl Acad Sci U S A* **99**, 7728-33 (2002).
3. Hirayama, J. et al. CLOCK-mediated acetylation of BMAL1 controls circadian function. *Nature* **450**, 1086-90 (2007).
4. Duffield, G. E. et al. Circadian programs of transcriptional activation, signaling, and protein turnover revealed by microarray analysis of mammalian cells. *Curr Biol* **12**, 551-7 (2002).
5. Grundschober, C. et al. Circadian regulation of diverse gene products revealed by mRNA expression profiling of synchronized fibroblasts. *J Biol Chem* **276**, 46751-8 (2001)
6. Nakahata, Y. et al. The NAD<sup>+</sup>-dependent deacetylase SIRT1 modulates CLOCK-mediated chromatin remodeling and circadian control. *Cell* **134**, 329-40 (2008).
